# Supplementary material for: High Prevalence of Hypovitaminosis D in Adolescents Attending a Reference Centre for the Treatment of Obesity in Switzerland
Source: MDPI journal article supplement (doi:10.3390/children9101527), 2022-10-06
Supplement: s1 [file s1]

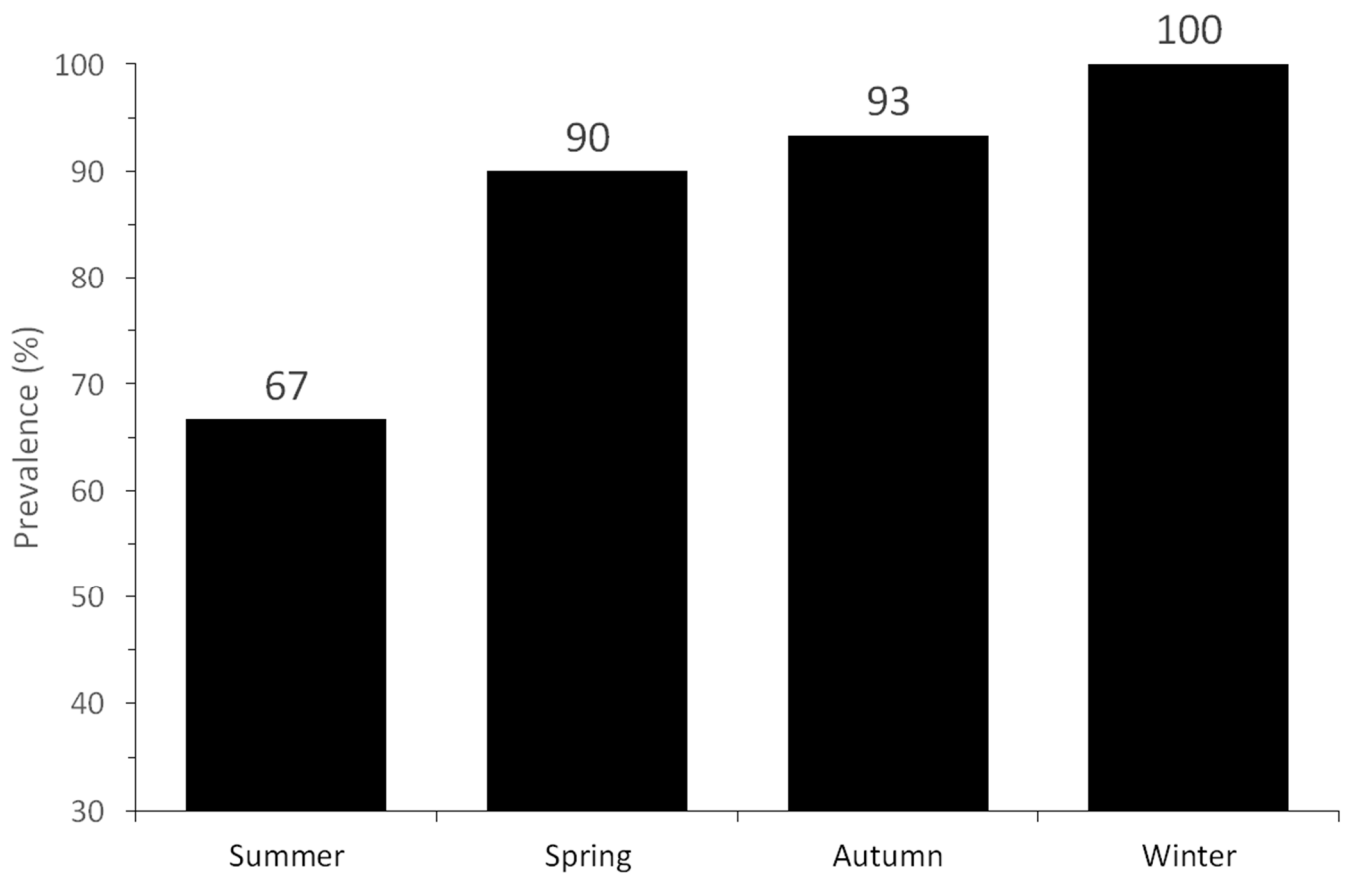

**Figure S1.** Prevalence of hypovitaminosis D according to season.

**Table S1.** Characteristics of included and excluded participants.

|                                      | <b>Excluded</b> | <b>Included</b> | <b>p-value</b> |
|--------------------------------------|-----------------|-----------------|----------------|
| Sample size                          | 54              | 52              |                |
| Girls (%)                            | 27 (50.0)       | 16 (30.8)       | 0.044          |
| Age (years)                          | 13.2 ± 1.7      | 13.0 ± 2.1      | 0.599          |
| Swiss (%)                            | 26 (48.2)       | 23 (44.2)       | 0.686          |
| Body mass index (kg/m <sup>2</sup> ) | 29.5 ± 5.8      | 30.0 ± 4.6      | 0.653          |
| Body mass index categories (%)       |                 |                 | 0.055          |
| Obesity                              | 43 (79.6)       | 32 (61.5)       |                |
| Severe obesity                       | 11 (20.4)       | 20 (38.5)       |                |
| Body mass index z-score              | 2.5 ± 0.6       | 2.7 ± 0.5       | 0.041          |

N=54 for the excluded participants. Results are expressed as number of participants (percentage) or as mean ± standard deviation. Statistical analysis by chi-square for categorical variables and by student's t-test for continuous variables.

**Table S2.** Characteristics of participants according to vitamin D status.

|                                      | <b>Normal</b>      | <b>Hypovitaminosis</b> | <b>p-value</b> |
|--------------------------------------|--------------------|------------------------|----------------|
| Sample size                          | 6                  | 46                     |                |
| Girls (%)                            | 2 (33.3)           | 14 (30.4)              | 1.000          |
| Age (years)                          | 11.9 ± 2.0         | 13.5 ± 2.1             | 0.082          |
| Swiss (%)                            | 2 (33.3)           | 21 (45.7)              | 0.682          |
| Height (cm)                          | 151 ± 6            | 162 ± 11               | 0.019          |
| Weight (kg)                          | 69.8 ± 18.3        | 79.8 ± 17.7            | 0.200          |
| Body mass index (kg/m <sup>2</sup> ) | 30.6 ± 6.9         | 30.2 ± 4.4             | 0.840          |
| BMI categories (%)                   |                    |                        | 0.379          |
| Obesity                              | 3 (50.0)           | 32 (69.6)              |                |
| Severe obesity                       | 3 (50.0)           | 14 (30.4)              |                |
| Body mass index z-score              | 3.0 ± 0.4          | 2.7 ± 0.5              | 0.114          |
| Initial vitamin D (ng/ml)            | 34.4 [32.3 - 38.9] | 17.2 [10.5 - 22.6]     |                |

Results are expressed as number of participants (percentage) for categorical variables and as mean ± standard deviation or median [interquartile range] for continuous variables. Statistical analysis by Fisher's exact test for categorical variables and by student's t-test for continuous variables.

**Table S3.** Results of the multivariate analysis of the factors associated with hypovitaminosis D.

|                                        | <b>Odds ratio and (95% CI)</b> | <b>p-value</b> |
|----------------------------------------|--------------------------------|----------------|
| Boys vs. girls                         | 1.63 (0.17 ; 16.0)             | 0.676          |
| Age (per one-year increase)            | 1.95 (0.97 ; 3.89)             | 0.059          |
| Non-Swiss vs. Swiss                    | 0.53 (0.07 ; 4.13)             | 0.543          |
| BMI (per 1 kg/m <sup>2</sup> increase) | 0.87 (0.68 ; 1.10)             | 0.246          |

BMI, body mass index; Results are expressed as odds ratio and (95% confidence interval). Statistical analysis by logistic regression. Season could not be included in the model as it lead to a singularity.
